# Supplementary material for: Central post-stroke pain: advances in clinical and preclinical research
Source: HighWire-hosted journal article supplement (doi:10.1136/svn-2024-003418), 2024-09-28
Supplement: svn-2024-003418supp001_data_supplement.pdf [file svn-2024-003418supp001_data_supplement.pdf]

## Supplemental References

1. Chen, K.Y. and R.Y. Li, *Efficacy and safety of different antidepressants and anticonvulsants in central poststroke pain: A network meta-analysis and systematic review*. PLoS One, 2022. **17**(10): p. e0276012.
2. Choi, H.R., A. Aktas, and M.M. Bottros, *Pharmacotherapy to Manage Central Post-Stroke Pain*. CNS Drugs, 2021. **35**(2): p. 151-160.
3. Haroutounian, S., et al., *How central is central poststroke pain? The role of afferent input in poststroke neuropathic pain: a prospective, open-label pilot study*. Pain, 2018. **159**(7): p. 1317-1324.
4. Scuteri, D., et al., *Opioids in Post-stroke Pain: A Systematic Review and Meta-Analysis*. Front Pharmacol, 2020. **11**: p. 587050.
5. Franzini, A., et al., *Deep brain stimulation of the posterior limb of the internal capsule in the treatment of central poststroke neuropathic pain of the lower limb: case series with long-term follow-up and literature review*. J Neurosurg, 2019. **Aug 16**: p. 1-9.
6. Lim, T.H., et al., *Thalamic Pain Misdiagnosed as Cervical Disc Herniation*. Korean J Pain, 2016. **29**(2): p. 119-22.
7. Zhao, C., et al., *Analgesic Effects of Navigated Repetitive Transcranial Magnetic Stimulation in Patients With Acute Central Poststroke Pain*. Pain and therapy, 2021. **10**(2): p. 1085-1100.
8. Ni, Z., et al., *Effects of deep brain stimulation on the primary motor cortex: Insights from transcranial magnetic stimulation studies*. Clin Neurophysiol, 2019. **130**(4): p. 558-567.
9. Hassan, A.B., et al., *Effect of transcranial direct current stimulation (tDCS) delivered via dorsolateral prefrontal cortex on central post-stroke pain and depression: a case report*. Physiother Theory Pract, 2022. **38**(11): p. 1799-1806.
10. Purohit, G., et al., *Stellate Ganglion Blocks for Refractory Central Poststroke Pain: A Case Series*. A A Pract, 2023. **17**(3): p. e01665.
11. Xu, X.M., et al., *Nonpharmacological therapies for central poststroke pain: A systematic review*. Medicine (Baltimore), 2020. **99**(42): p. e22611.
12. Corbetta, D., et al., *Mirror therapy for an adult with central post-stroke pain: a case report*. Arch Physiother, 2018. **8**: p. 4.
13. Cai, W., et al., *Disrupting interaction of PSD-95 with nNOS attenuates hemorrhage-induced thalamic pain*. Neuropharmacology, 2018. **141**: p. 238-248.
14. Shih, H.C., Y.H. Kuan, and B.C. Shyu, *Targeting brain-derived neurotrophic factor in the medial thalamus for the treatment of central poststroke pain in a rodent model*. Pain, 2017. **158**(7): p. 1302-1313.
15. Shyu, B.C., et al., *Tricyclic antidepressants and selective serotonin reuptake inhibitors but not anticonvulsants ameliorate pain, anxiety, and depression symptoms in an animal model of central post-stroke pain*. Mol Pain, 2021. **17**:

- p. 17448069211063351.
16. Kadono, Y., et al., *Repetitive transcranial magnetic stimulation restores altered functional connectivity of central poststroke pain model monkeys*. Sci Rep, 2021. **11**(1): p. 6126.
  17. Nagasaka, K., et al., *Late-onset hypersensitivity after a lesion in the ventral posterolateral nucleus of the thalamus: A macaque model of central post-stroke pain*. Sci Rep, 2017. **7**(1): p. 10316.
  18. Wang, C.C., et al., *Effects of thalamic hemorrhagic lesions on explicit and implicit learning during the acquisition and retrieval phases in an animal model of central post-stroke pain*. Behav Brain Res, 2017. **317**: p. 251-262.
  19. Lu, H.F., et al., *A new central post-stroke pain rat model: autologous blood injected thalamic hemorrhage involved increased expression of P2X4 receptor*. Neurosci Lett, 2018. **687**: p. 124-130.
  20. Chen, X., et al., *Alleviation of Mechanical Allodynia by 14,15-Epoxyeicosatrienoic Acid in a Central Poststroke Pain Model: Possible Role of Allopregnanolone and delta-Subunit-Containing Gamma-Aminobutyric Acid A Receptors*. J Pain, 2019. **20**(5): p. 577-591.
  21. Ren, H., et al., *Nrf2-BDNF-TrkB pathway contributes to cortical hemorrhage-induced depression, but not sex differences*. J Cereb Blood Flow Metab, 2021. **41**(12): p. 3288-3301.
  22. Shi, Z.M., et al., *Stellate ganglion block ameliorated central post-stroke pain with comorbid anxiety and depression through inhibiting HIF-1alpha/NLRP3 signaling following thalamic hemorrhagic stroke*. J Neuroinflammation, 2023. **20**(1): p. 82.
  23. Shi, X., et al., *Behavioral Assessment of Sensory, Motor, Emotion, and Cognition in Rodent Models of Intracerebral Hemorrhage*. Front Neurol, 2021. **12**: p. 667511.
  24. Danyang, C., et al., *Behavioral assessment of post-stroke depression and anxiety in rodents*. Brain Hemorrhages, 2020. **1**(2): p. 105-111.
  25. Matsuura, W., et al., *Evidence of a role for spinal HMGB1 in ischemic stress-induced mechanical allodynia in mice*. Brain Res, 2018. **1687**: p. 1-10.
  26. Anttila, J.E., S. Poyhonen, and M. Airavaara, *Secondary Pathology of the Thalamus after Focal Cortical Stroke in Rats is not Associated with Thermal or Mechanical Hypersensitivity and is Not Alleviated by Intra-Thalamic Post-Stroke Delivery of Recombinant CDNF or MANF*. Cell Transplant, 2019. **28**(4): p. 425-438.
  27. Matsuura, W., K. Nakamoto, and S. Tokuyama, *Involvement of descending pain control system regulated by orexin receptor signaling in the induction of central post-stroke pain in mice*. Eur J Pharmacol, 2020. **874**: p. 173029.
  28. Matsuura, W., K. Nakamoto, and S. Tokuyama, *The Involvement of DDAH1 in the Activation of Spinal NOS Signaling in Early Stage of Mechanical Allodynia Induced by Exposure to Ischemic Stress in Mice*. Biol Pharm Bull, 2019. **42**(9): p. 1569-1574.
  29. Kuan, Y.H., H.C. Shih, and B.C. Shyu, *Involvement of P(2)X(7) Receptors and*

- BDNF in the Pathogenesis of Central Poststroke Pain*. Adv Exp Med Biol, 2018. **1099**: p. 211-227.
30. Guo, X., et al., *MicroRNA-133b-3p Targets Purinergic P2X4 Receptor to Regulate Central Poststroke Pain in Rats*. Neuroscience, 2022. **481**: p. 60-72.
31. Infantino, R., et al., *MED1/BDNF/TrkB pathway is involved in thalamic hemorrhage-induced pain and depression by regulating microglia*. Neurobiol Dis, 2022. **164**: p. 105611.
32. Yang, F., et al., *SDF1-CXCR4 Signaling Maintains Central Post-Stroke Pain through Mediation of Glial-Neuronal Interactions*. Front Mol Neurosci, 2017. **10**: p. 226.
33. Ueda, H., et al., *Lysophosphatidic acid LPA1 and LPA3 receptors play roles in the maintenance of late tissue plasminogen activator-induced central poststroke pain in mice*. Neurobiol Pain, 2019. **5**: p. 100020.
34. Nagasaka, K., et al., *Structural Plastic Changes of Cortical Gray Matter Revealed by Voxel-Based Morphometry and Histological Analyses in a Monkey Model of Central Post-Stroke Pain*. Cereb Cortex, 2021. **31**(10): p. 4439-4449.
