# Supplementary material for: Central post-stroke pain: advances in clinical and preclinical research
Source: HighWire-hosted journal article supplement (doi:10.1136/svn-2024-003418), 2024-09-28
Supplement: svn-2024-003418supp004_data_supplement.pdf [file svn-2024-003418supp004_data_supplement.pdf]

### Supplementary Material 3

#### Thermal pain

The animals affected by CPSP exhibited lasting thermal-induced pain ranging from 7 to 35 days, as determined by the hot water bath and plantar test.[13-15] Upon further examination, the pain assessed by the withdrawal latency of both paws persisted for 8-16 weeks.[16] The pain measured by the hot water bath and plantar test was observed on both the ipsilateral [15, 17, 18] and contralateral [13, 14] sides, with varying duration on both sides.[17, 18] Rats with CPSP demonstrated heightened sensitivity to contralateral thermal pain, as assessed by the paw-withdrawal response to hot water from 1 to 3 weeks, while ipsilateral thermal pain persisted until the fifth week.[18] Nevertheless, certain studies have documented no changes in thermal pain measured by paw withdrawal latency after CPSP.[19, 20]
